# Supplementary material for: Controlled amino-functionalization by electrochemical reduction of bromo and nitro azobenzene layers bound to Si(111) surfaces
Source: Royal Society of Chemistry journal article supplement (doi:10.1039/c4cp02464h), 2014-01-01
Supplement: c4cp02464h1.pdf [file c4cp02464h1.pdf]

**Supporting Information to**  
**Controlled Amino-functionalization by Electrochemical**  
**Reduction of Bromo and Nitro Azo Benzene Layers Bound to**  
**Si(111) Surfaces**

*Daniela Ullien<sup>1</sup>, Peter C. Thüne<sup>2,†</sup>, Wolter F. Jager<sup>1</sup>, Ernst J.R. Sudhölter<sup>1</sup>, Louis C.P.M.  
de Smet<sup>1,\*</sup>*

1) Department of Chemical Engineering, Delft University of Technology,  
Julianalaan 136, 2628 BL Delft, the Netherlands

2) Faculty of Chemical Engineering, Catalysis & Energy, Eindhoven University of  
Technology, 5600 MB Eindhoven, The Netherlands

---

\* Corresponding author. Tel.: +31 152782636; fax: +31 152788668. E-mail address:

[l.c.p.m.desmet@tudelft.nl](mailto:l.c.p.m.desmet@tudelft.nl) (L.C.P.M. de Smet).

† Current address: Fontys Hogescholen, Rachelsmolen 1, 5612 MA Eindhoven, The Netherlands

### Constant N<sub>1s</sub> signal upon XPS illumination

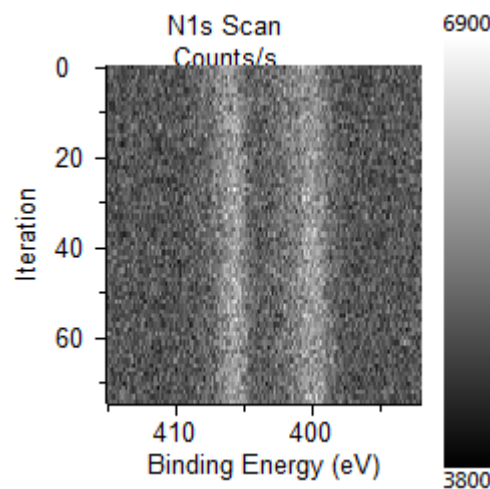

**Figure A1.** XPS N<sub>1s</sub> spectra taken during 15 min (75 iterations) upon illuminating a sample of 4-nitrobenzenediazonium electrografted on Si with a pass energy of 50 eV. No significant changes were observed in the peak intensities with X-ray exposure time.

### RMS roughness of the samples in AFM

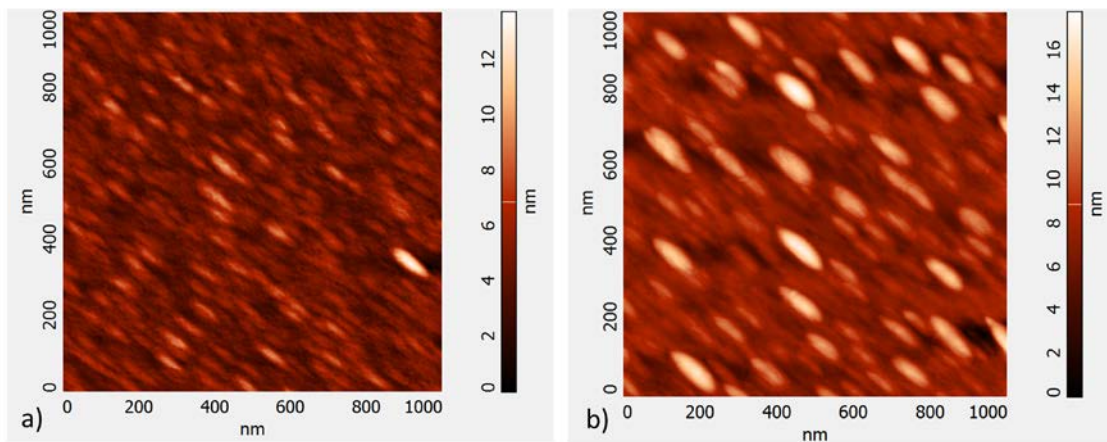

**Figure A2.** AFM topography scans of the samples before (a) and after (b) the electroreduction of 4-bromobenzediazonium on Si. Upon electroreduction the rms roughness value increased from 1.1 nm to 1.5 nm for a  $1 \times 1 \mu\text{m}^2$  scan.

### Electroreduction of 4-BBD-modified Si (Azo-bond cleavage)

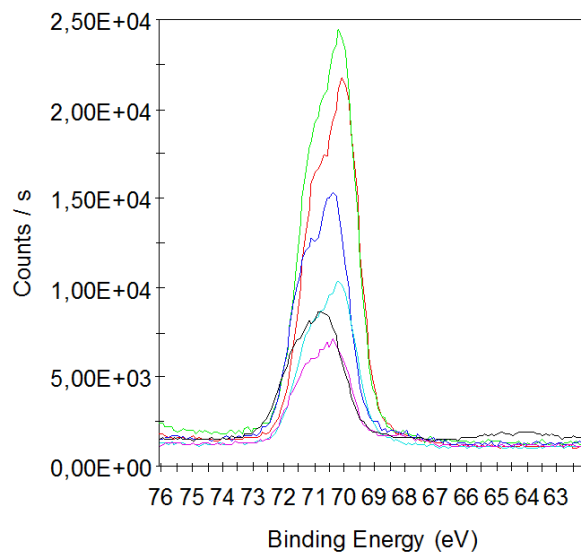

**Figure A3.** XPS Br<sub>3d</sub> spectra of bromobenzene electrografted on Si (3 upper graphs), and bromobenzene after the reduction of azobenzene on Si (3 lower graphs). On average the reduction is 43%.
